# Supplementary material for: Comparative Transcriptome Analysis Reveals Sex-Based Differences during the Development of the Adult Parasitic Wasp Cotesia vestalis (Hymenoptera: Braconidae)
Source: MDPI journal article supplement (doi:10.3390/genes12060896), 2021-06-10
Supplement: s1 [file s1]

**Table S2** RNA-Seq sequencing data summary.

| <b>Sample</b> | <b>Raw Reads No.</b> | <b>Clean Reads No.</b> | <b>Q30 (%)</b> | <b>Mapped Reads No.</b> | <b>Mapping Rate (%)</b> | <b>Assembled transcripts No.</b> |
|---------------|----------------------|------------------------|----------------|-------------------------|-------------------------|----------------------------------|
| PM2d_1        | 44,033,388           | 43,759,232             | 92.22          | 41,590,220              | 95.04                   | 22,300                           |
| PM2d_2        | 46,697,504           | 46,500,602             | 92.74          | 44,379,153              | 95.44                   | 22,608                           |
| PM2d_3        | 47,142,052           | 46,852,494             | 93.62          | 44,757,492              | 95.53                   | 21,691                           |
| PF2d_1        | 41,933,846           | 41,139,782             | 92.78          | 38,991,656              | 94.78                   | 21,005                           |
| PF2d_2        | 45,680,646           | 44,914,330             | 92.81          | 42,500,418              | 94.63                   | 21,691                           |
| PF2d_3        | 42,303,128           | 41,544,724             | 91.93          | 39,057,644              | 94.01                   | 21,635                           |
| PM3d_1        | 46,637,386           | 46,443,740             | 93.85          | 44,586,508              | 96.00                   | 19,809                           |
| PM3d_2        | 45,498,354           | 45,291,078             | 93.82          | 43,455,865              | 95.95                   | 19,969                           |
| PM3d_3        | 46,755,536           | 46,546,310             | 92.76          | 44,554,400              | 95.72                   | 20,263                           |
| PF3d_1        | 44,276,248           | 43,984,210             | 93.28          | 42,130,921              | 95.79                   | 20,334                           |
| PF3d_2        | 46,723,798           | 46,492,992             | 92.96          | 44,518,135              | 95.75                   | 20,577                           |
| PF3d_3        | 46,372,024           | 46,061,682             | 92.52          | 44,056,046              | 95.65                   | 20,267                           |
| PM4d_1        | 43,671,708           | 43,385,016             | 92.28          | 41,231,569              | 95.04                   | 19,850                           |
| PM4d_2        | 44,121,254           | 43,873,038             | 93.11          | 41,955,730              | 95.63                   | 19,680                           |
| PM4d_3        | 44,794,120           | 44,503,622             | 93.65          | 42,490,117              | 95.48                   | 20,021                           |
| PF4d_1        | 44,237,218           | 44,045,830             | 92.93          | 42,140,802              | 95.67                   | 21,185                           |
| PF4d_2        | 46,982,982           | 46,785,592             | 93.27          | 44,695,703              | 95.53                   | 21,829                           |
| PF4d_3        | 44,201,712           | 43,916,196             | 93.44          | 41,982,303              | 95.60                   | 21,312                           |
| AM1d_1        | 46,543,036           | 46,230,626             | 93.02          | 44,111,210              | 95.42                   | 22,079                           |
| AM1d_2        | 44,875,604           | 44,653,156             | 93.42          | 42,604,337              | 95.41                   | 21,421                           |
| AM1d_3        | 44,201,930           | 43,922,388             | 92.42          | 41,866,117              | 95.32                   | 21,737                           |
| AF1d_1        | 44,327,068           | 44,094,826             | 93.59          | 42,148,204              | 95.59                   | 23,257                           |
| AF1d_2        | 46,001,024           | 45,740,928             | 93.36          | 43,667,483              | 95.47                   | 23,452                           |
| AF1d_3        | 44,816,536           | 44,620,214             | 93.27          | 42,628,625              | 95.54                   | 23,261                           |

**Table S3** Data overview of RNA-Seq and Iso-Seq mapped to *C. vestalis* genome.

| <b>Sequencing pattern</b> | <b>Transcripts No.</b> | <b>Non-redundant transcripts No.<sup>1</sup></b> | <b>Gene coverage</b> | <b>Novel non-redundant transcripts No.</b> |
|---------------------------|------------------------|--------------------------------------------------|----------------------|--------------------------------------------|
| RNA-Seq                   | 32,102                 | 22,196                                           | 13,388 (99.98%)      | 14,466                                     |
| Iso-Seq                   | 77,590                 | 76,773                                           | 7,629 (56.97%)       | 11,849                                     |

<sup>1</sup>Non-redundant transcripts No.: Remove the number of duplicate isoforms by CD-hit-est (default parameters).

**Table S4** PacBio single-molecular long-read sequencing data summary.

| Category                                 | 1-2kb   | 2-3kb   | 3-6kb  | Total   |
|------------------------------------------|---------|---------|--------|---------|
| Circular-consensus sequences(CCSs)       | 157,628 | 175,506 | 79,090 | 412,224 |
| Number of poly-A reads                   | 114,990 | 110,511 | 51,671 | 277,172 |
| Number of filtered short reads           | 8,445   | 7,994   | 1,473  | 17,912  |
| Non-full-length(NFL)                     | 54,784  | 88,194  | 40,953 | 183,931 |
| Full-length                              | 94,399  | 79,318  | 36,664 | 210,381 |
| Full-length non-chimeric(FLNC)           | 92,921  | 78,624  | 36,410 | 207,955 |
| Average FLNC length(bp)                  | 1,471   | 2,566   | 3,482  | 7,519   |
| Number of consensus isoforms             | 33,112  | 25,553  | 19,473 | 78,138  |
| Average consensus isoforms read length   | 1,489   | 2,648   | 3,626  | 7,763   |
| Number of polished high-quality isoforms | 16,964  | 10,461  | 6,839  | 34,264  |
| Number of polished low-quality isoforms  | 16,148  | 15,090  | 12,634 | 43,872  |

**Table S12** Alternative splicing genes identified in RNA-Seq data of different developmental stages and sexes in *C. vestalis*.

| Type  | PM2d  | PM3d  | PM4d  | AM1d  | PF2d  | PF3d  | PF4d  | AF1d  | Total |
|-------|-------|-------|-------|-------|-------|-------|-------|-------|-------|
| A3    | 1,385 | 1,265 | 1,267 | 1,334 | 1,349 | 1,280 | 1,347 | 1,507 | 1,835 |
| A5    | 1,410 | 1,315 | 1,299 | 1,393 | 1,398 | 1,346 | 1,397 | 1,505 | 1,857 |
| AF    | 348   | 317   | 310   | 321   | 314   | 313   | 338   | 363   | 574   |
| AL    | 94    | 86    | 83    | 88    | 97    | 84    | 90    | 98    | 141   |
| RI    | 397   | 354   | 327   | 356   | 375   | 345   | 352   | 388   | 692   |
| SE    | 506   | 483   | 490   | 515   | 526   | 474   | 517   | 614   | 770   |
| MX    | 32    | 33    | 32    | 31    | 34    | 33    | 33    | 36    | 47    |
| Total | 3,198 | 2,960 | 2,927 | 3,088 | 3,120 | 2,964 | 3,102 | 3,402 | 4,192 |

**1-day-old pupae**  
(male or female)

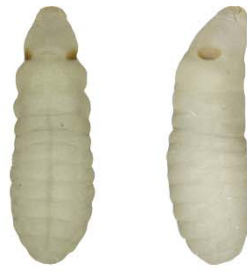

**male**

**female**

1mm

**2-day-old pupae**

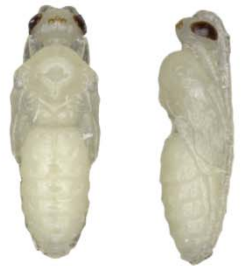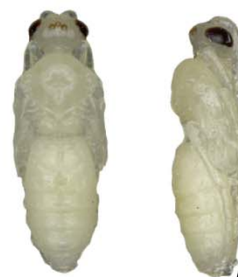

**3-day-old pupae**

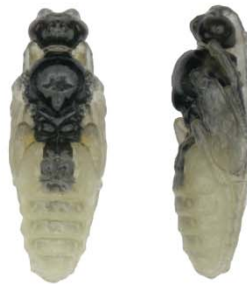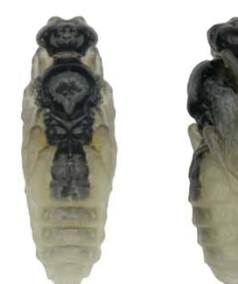

**4-day-old pupae**

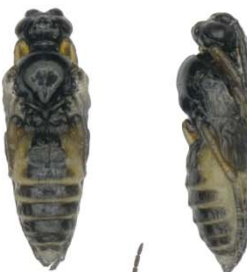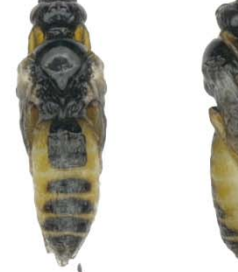

**1-day-old adults**

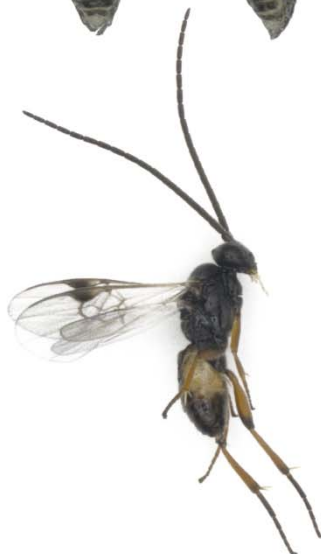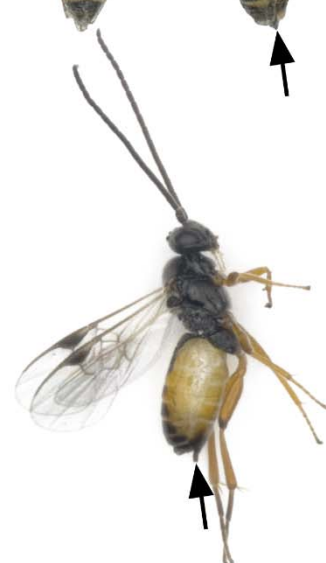

**Figure S1.** Representative images of *C. vestalis* different developmental stages of pupae and adults both sexes (male: left, female: right). The pupal stage is shown in front and side views. The black arrow indicates the valvula of ovipositor and mature ovipositor, respectively. Scale bar: 1 mm.

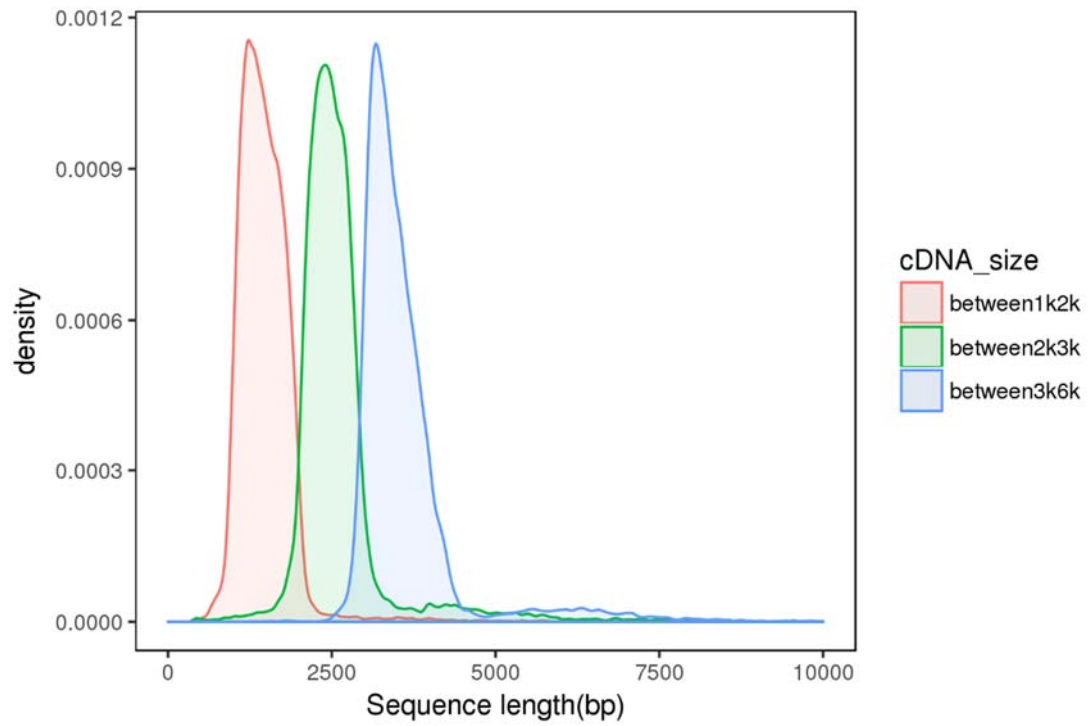

**Figure S2.** Consensus length density of *C. vestalis* unigenes obtained by PacBio Iso-Seq.

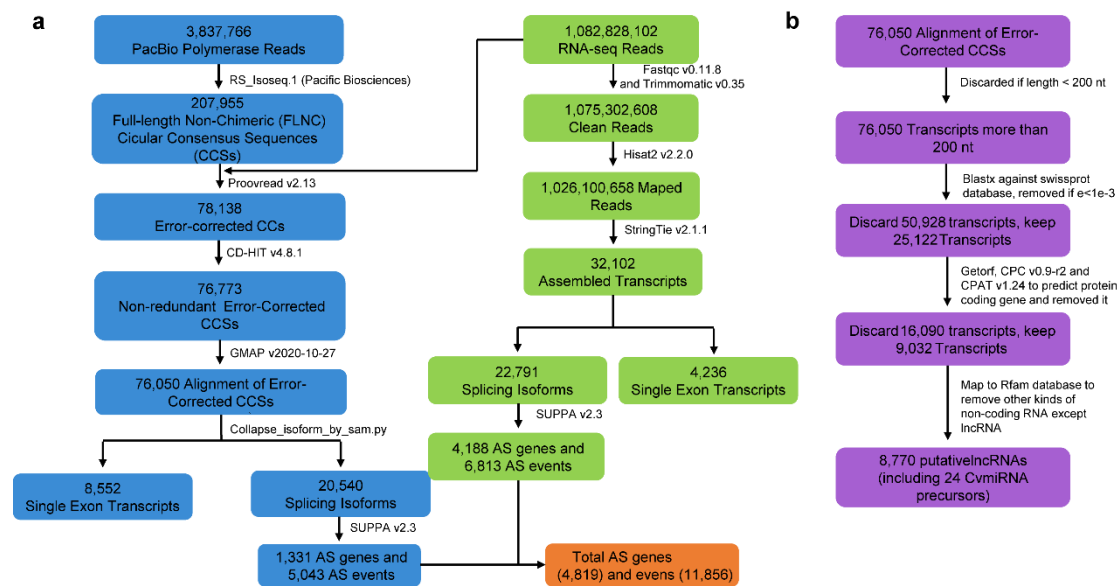

**Figure S3.** Computational pipeline for alternative splicing analysis and lncRNAs identification by combining Iso-Seq and RNA-Seq. **(a)** The workflow for the identification of alternative splicing by combining the data of Iso-Seq and RNA-Seq. The RNA-Seq data were mapped against the *C. vestalis* genome assembly CvesOGS1.0 by Hisat2 v2.2.0, and the transcripts were assembled using StringTie v2.1.1. In addition, the circular consensus sequences (CCSs) were calculated from PacBio subreads and corrected using the proofreading software Proovread v2.13 combined with RNA-Seq data. Then, the non-redundant error-corrected CCSs were obtained by using CD-HIT v4.8.1. Furthermore, the non-redundant and corrected full-length non-chimeric CCSs (FLNC CCSs) were mapped against CvesOGS1.0 using GMAP v2020-10-27 with default parameters. Next, the mapped reads were sorted and filtered, followed by being collapsed into non-redundant splicing isoforms by using collapse\_isoforms\_by\_sam.py ([https://github.com/Magdoll/cDNA\\_Cupcake](https://github.com/Magdoll/cDNA_Cupcake)). AS was identified by the software SUPPA v2.3 based on the GTF files produced after Iso-Seq and RNA-Seq data were mapped to the genome of *C. vestalis*. **(b)** The workflow for the identification of lncRNAs in *C. vestalis*.

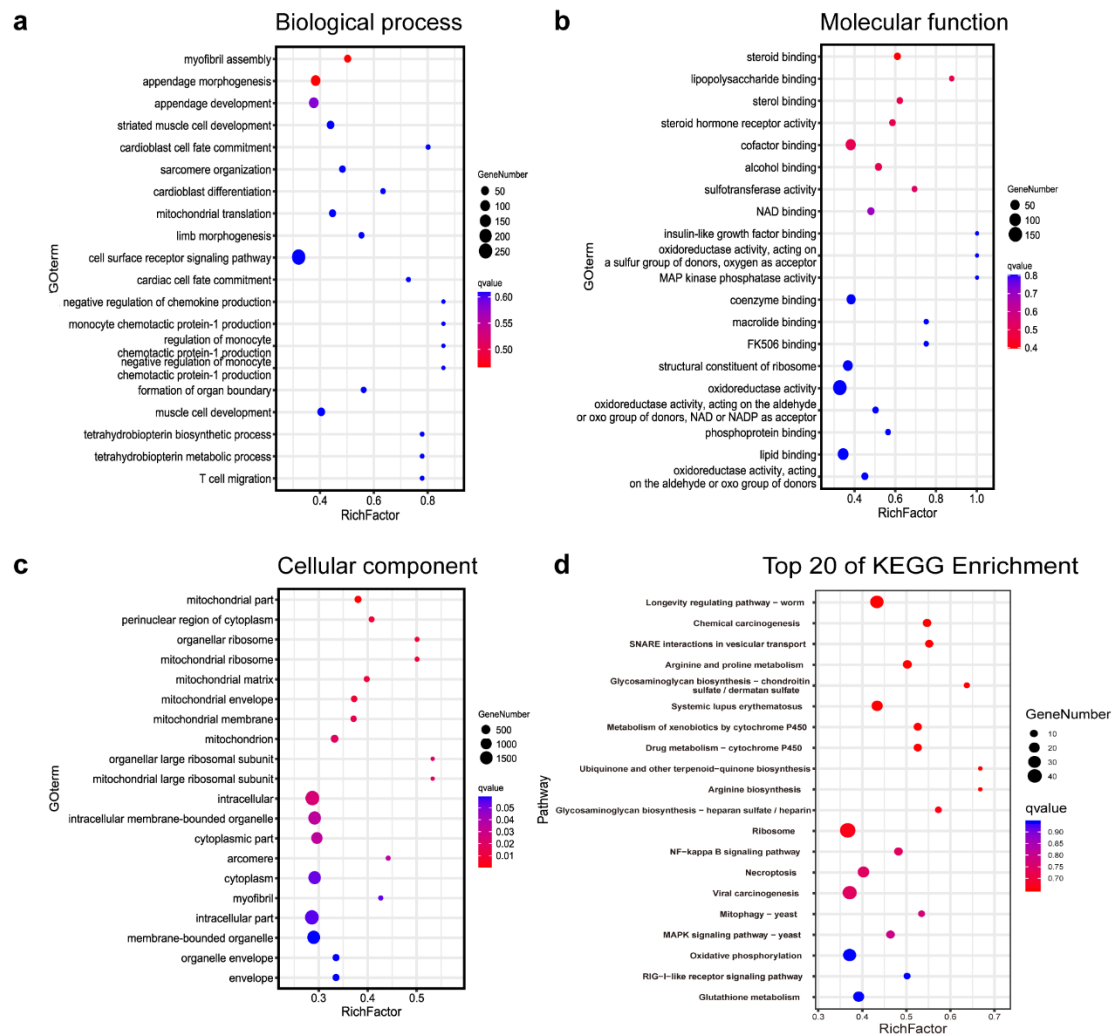

**Figure S4.** GO and KEGG annotation of putative targeted genes of lncRNA. The GO annotation include three subgroups: biological process (BP), cellular component (CC), and molecular function (MF). (a) The top 20 GO categories in biological process. (b) The top 20 GO categories in cellular component. (c) The top 20 GO categories in molecular function. (d) The top 20 KEGG enrichment pathways of putative target genes of lncRNA.

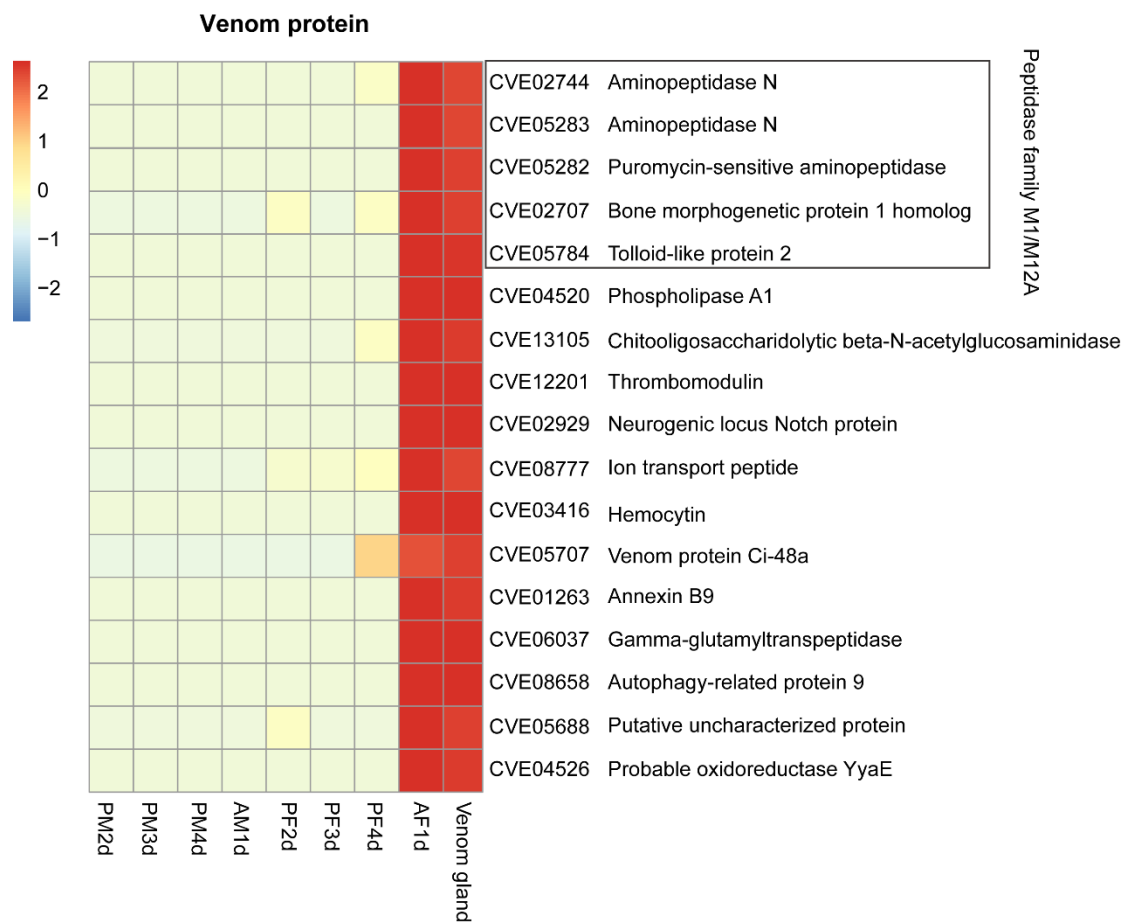

**Figure S5.** *C. vestalis* putative venom protein genes expression pattern.



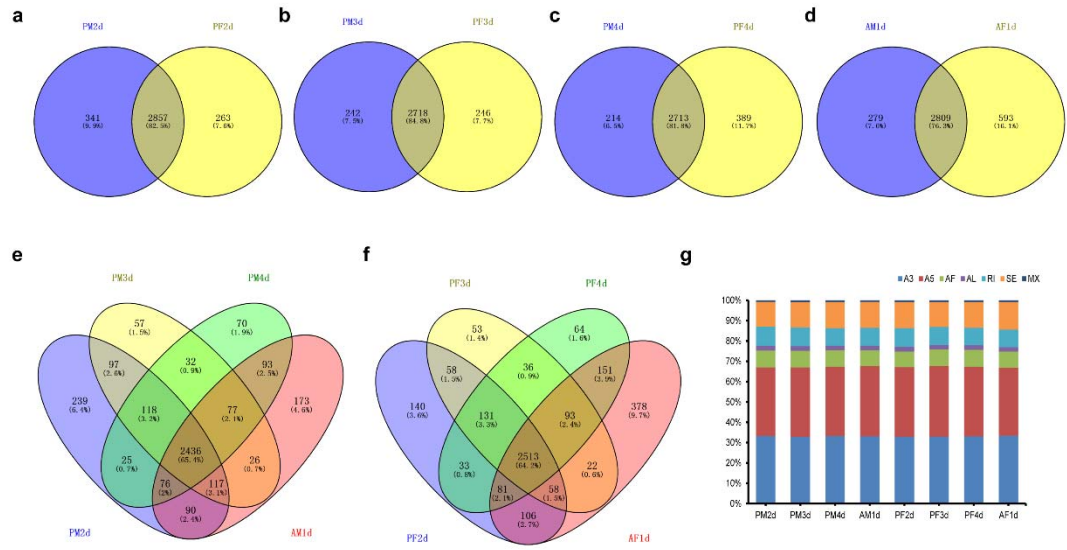

**Figure S6.** AS events identified in the *C. vestalis* genome. **(a)** Venn diagram of AS genes identified in PM2d and PF2d. **(b)** Venn diagram of AS genes identified in PM3d and PF3d. **(c)** Venn diagram of AS genes identified in PM4d and PF4d. **(d)** Venn diagram of AS genes identified in AM1d and AF1d. **(e)** Venn diagram of AS genes identified in different developmental stages of male in *C. vestalis*. **(f)** Venn diagram of AS genes identified in different developmental stages of female in *C. vestalis*. **(g)** Distribution of the different AS events among developmental stages including those are common in all stages.

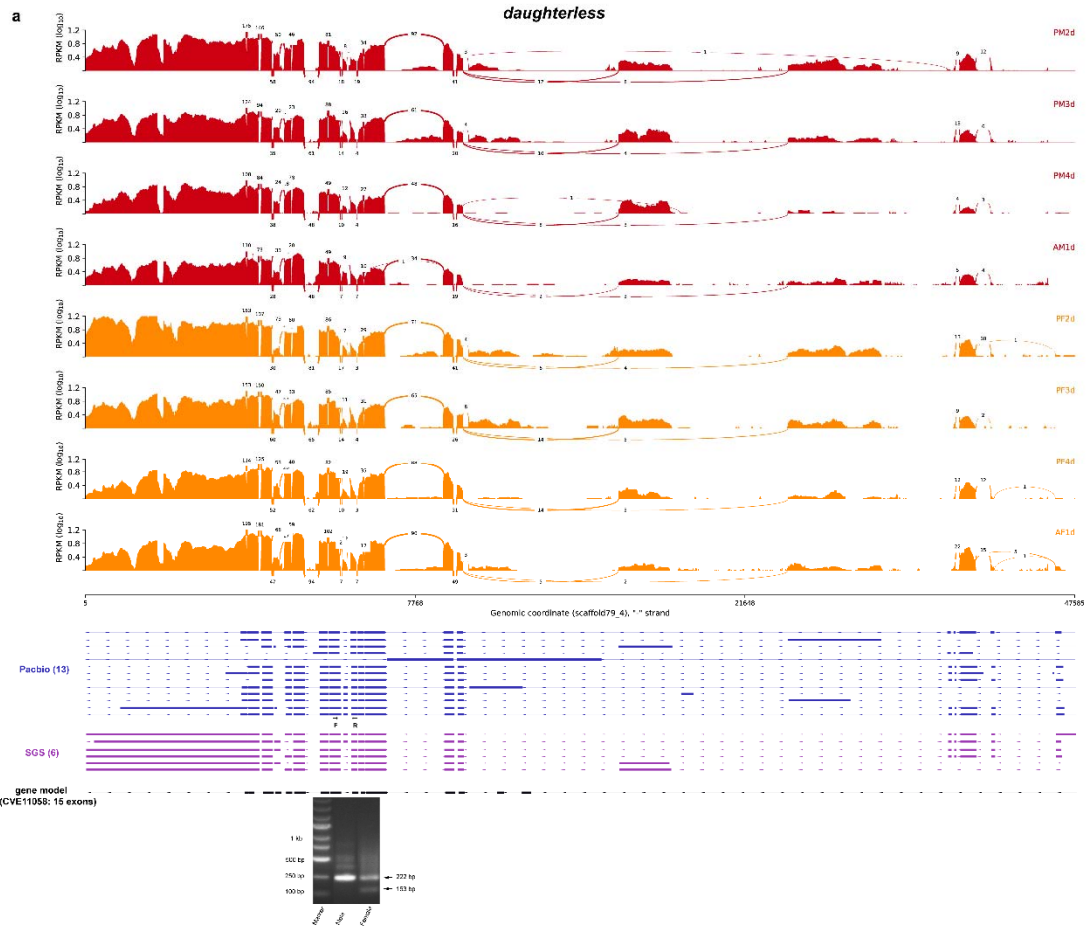

b

*fruitless*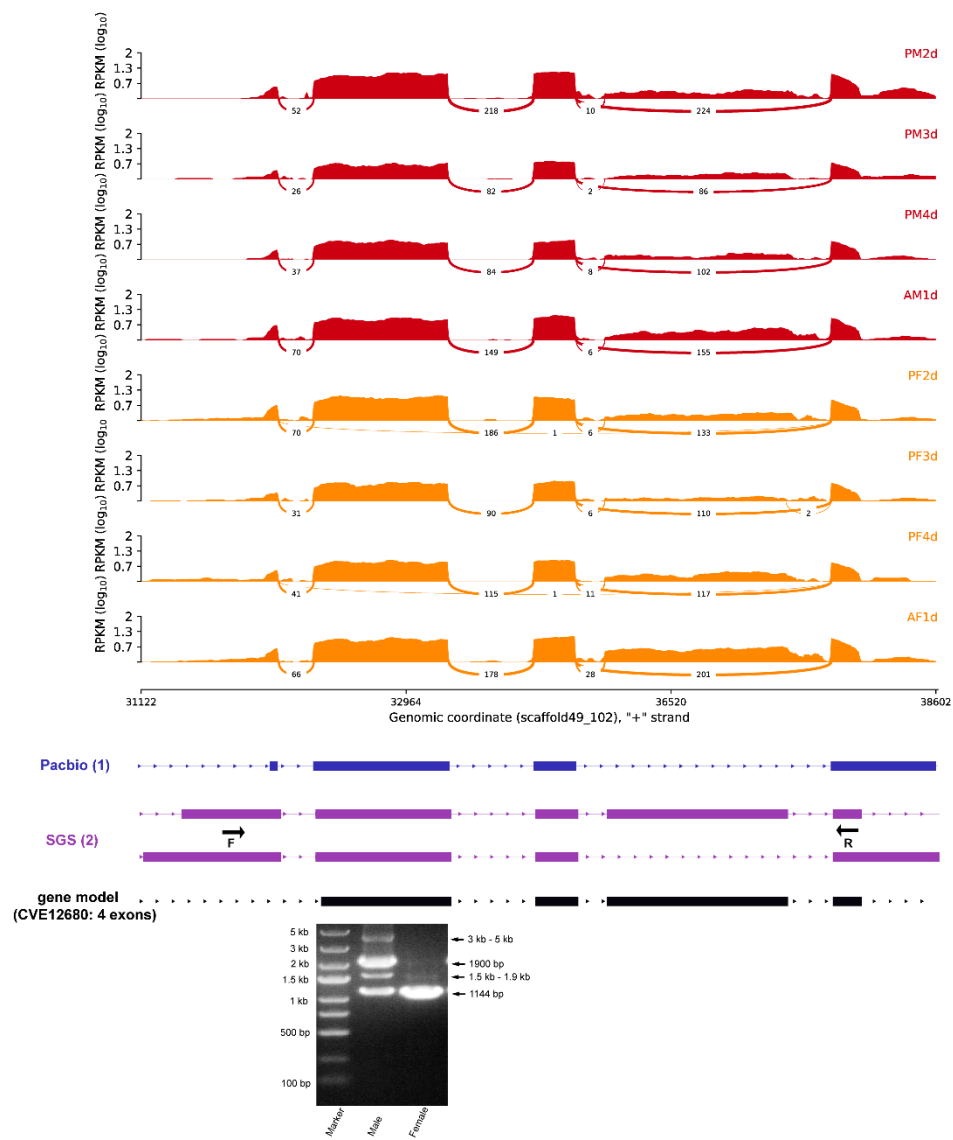

c

*transformer-2*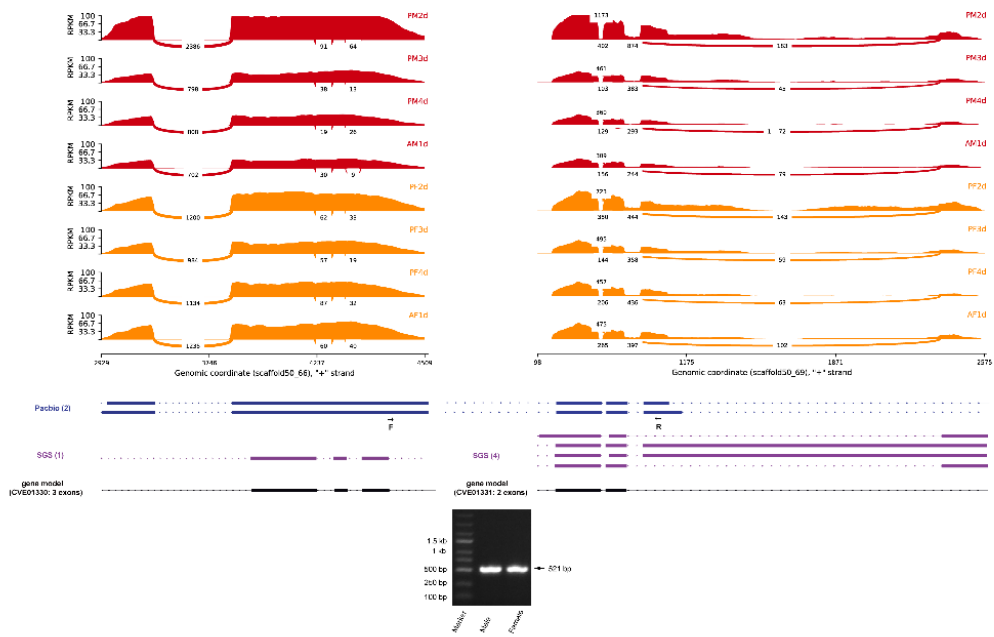

d

*intersex*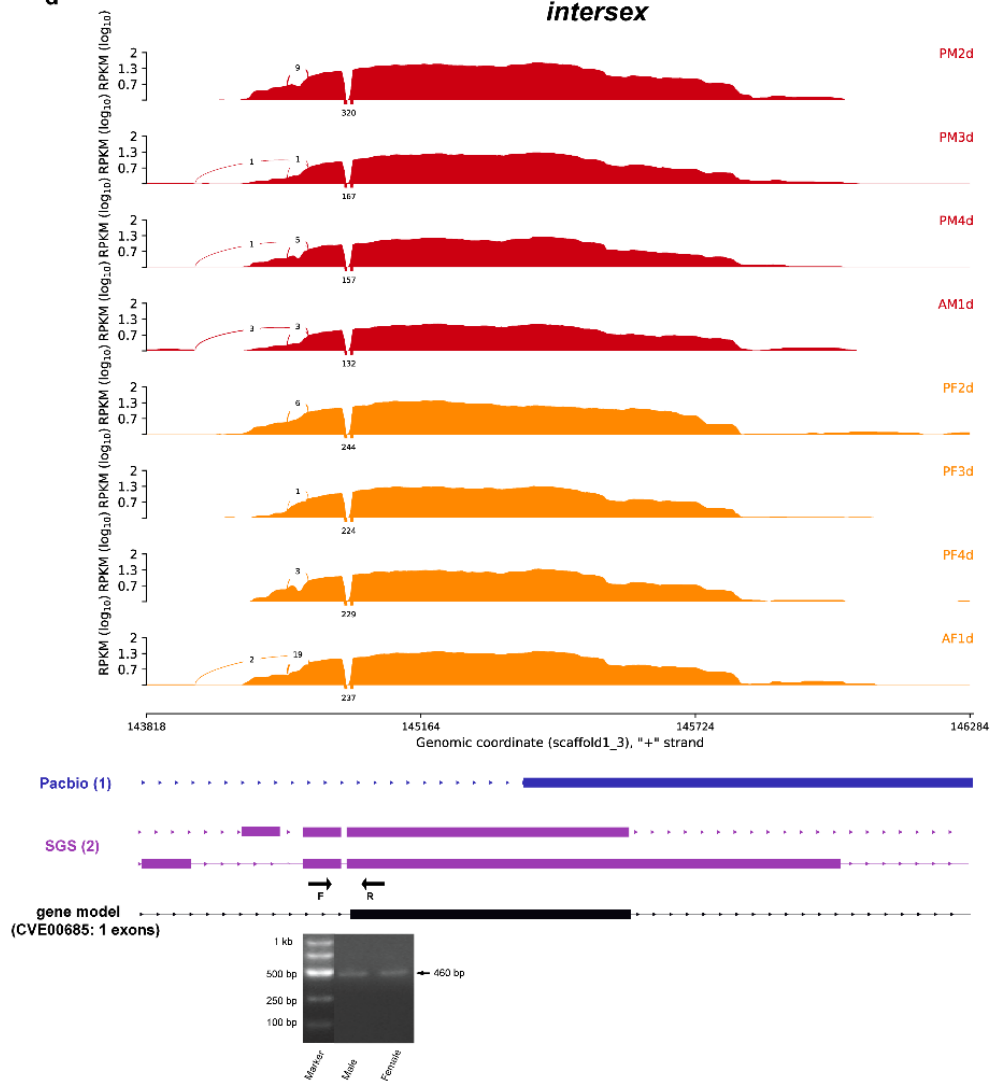

**Figure S7.** Alternative splicing events of four sex determining genes in *C. vestalis*. **(a)** Sashimi plot showing 19 alternative isoforms of *daughterless* gene in *C. vestalis*. **(b)** Sashimi plot showing 3 alternative isoforms of *fruitless* gene in *C. vestalis*. **(c)** Sashimi plot showing 7 alternative isoforms of *transformer-2* gene in *C. vestalis*. **(d)** Sashimi plot showing 3 alternative isoforms of *intersex* gene in *C. vestalis*. The thickness of curve in red and orange crossing two splicing junction sites (SJ) represents the coverage degree of Illumina RNA-Seq reads, and the number of junction reads is marked in the middle of the splicing site. The RNA coverage was given as the log-transformed reads per kilobase of transcript per million mapped reads (RPKM) value. Blocks represent exons and lines represent introns. The black rectangular box indicates sex-biased exons selected for RT-PCR verification. Forward and reverse primers used in RT-PCR were marked as F and R, respectively. SGS, second generation sequencing.
